# Supplementary material for: PCR-based assays for validation of single nucleotide polymorphism markers in rice and mungbean
Source: PubMed Central journal article supplement (PMC5270362; doi:10.1186/s41065-016-0024-y), 2017-01-26
Supplement: 41065_2016_24_MOESM1_ESM.pdf [file 41065_2016_24_MOESM1_ESM.pdf]

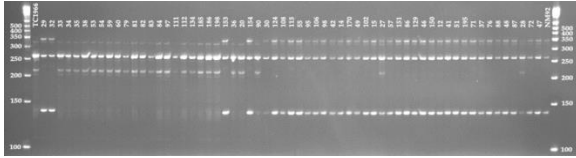

a)

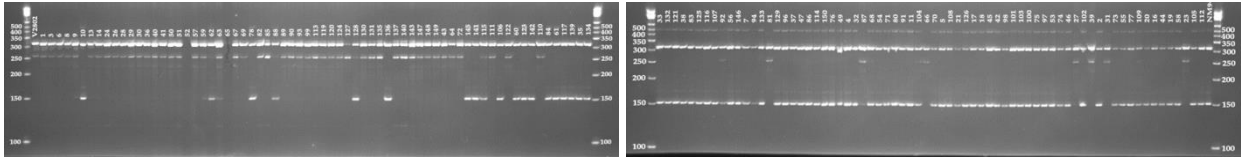

b)

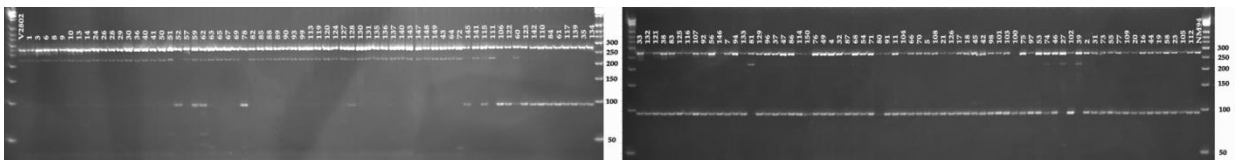

c)

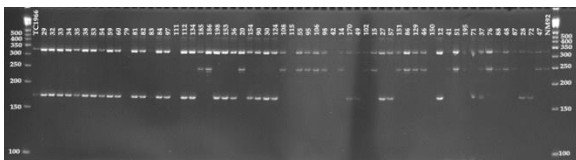

d)

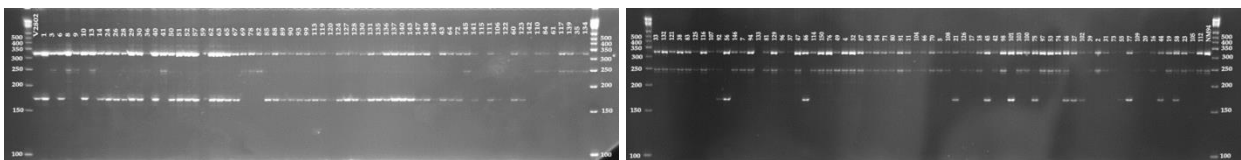

e)

Additional file 1: Genotyping segregating mungbean populations with tetra markers: tetra\_6 in population TC1966 x NM92 (a), tetra\_7 in V2802 x NM94 (b), tetra\_9 in V2802 x NM94 (c), and tetra\_12 in TC1966 x NM92 (d) and V2802 x NM94 e).
